# Supplementary material for: Assessment and Prediction of Maize Production Considering Climate Change by Extreme Learning Machine in Czechia
Source: MDPI journal article supplement (doi:10.3390/agronomy11112344), 2021-11-19
Supplement: s1 [file s1]

## Calculation of water deficit

Water deficit/surplus for given crops is based on the Czech technical norm (ČSN 750434). The norm uses standardized temperatures (**ST**) according to the long term averages. For these standardized temperatures were devoted to optimal rainfalls (**OR**). These optimal rainfalls (in mm) are stated for the vegetation period (April - October) and they represent the sum of monthly rainfalls that ensure maximal yield for given commodities.

Table S1. Water requirements calculation

| Line | Crop/Item/Month                                                                     | Unit |
|------|-------------------------------------------------------------------------------------|------|
| 1    | Temp Standard ( <b>TS</b> ) (table L1, ČSN 750434)                                  | °C   |
| 2    | Observed temperature (WWW.CHMI.CZ)                                                  | °C   |
|      | Rounded to the whole numbers ( <b>ROT</b> )                                         | °C   |
| 3    | Temperature difference ( <b>td</b> )(Line2 - Line1)                                 | °C   |
| 4    | Optimal rainfalls (HEMERKA, In: ČSN 750434)                                         | mm   |
| 5    | Adjustment <sup>1)</sup> for OR ( <b>aor</b> ) (norma ČSN 750434)                   | mm   |
| 6    | Adjusted OR ( <b>AOR</b> ) (Line5 + Line 4), Correspond with water requirement (WR) | mm   |
| 7    | Observed rainfalls (CHMI.CZ)                                                        | mm   |
| 8    | Deficit d (-) / excess water e (+) (Line7 - Line6)                                  | mm   |

Note:

- 1) For each +1°C above the temperature standard are OR increased by 5 mm, and the opposite for each -1°C below the temperature standard are OR decreased about 5 mm.

Source: Authors based on ČSN 750434, STR. 40, PŘÍLOHA L (TS, OR) and CHMI, 2018, online 2020.

Table S2. Temperature standards

| Month                   | IV | V  | VI | VII | VIII | IX | X  |
|-------------------------|----|----|----|-----|------|----|----|
| Normal Temperature (°C) | 9  | 14 | 17 | 19  | 18   | 14 | 12 |

Source: ČSN 750434

The obtained results can be negative values when there was recorded the water surplus, or positive if there was a lack of rainfall and water deficit was calculated.

Water deficit (**DW** in mm) is the sum of water deficits for observed months (**d**) in the given year. Water surplus (**s**) in one month can affect the water balance in the following month, thus the rainfalls above the stated OR are transferred do the next month in max. value of |30|mm (ČSN 75 0434). Then the DW is multiplied by the size of the harvest area (**A**).

The water deficit (DW) is calculated according to the following formulas:

$$DW = WB * A$$

Where:  $DW$  = water deficit,  $WB$  = water balance,  $A$  = harvest area of a given crop

$$WB = r - AOR$$

Where:  $WB$  = water balance,  $r$  = observed rainfalls for given period,  $AOR$  = Adjusted optimal rainfalls

$$AOR = aor + OR$$

Where:  $AOR$  = Adjusted optimal rainfalls,  $aor$  = adjustment for optimal rainfalls,  $OR$  = optimal rainfalls

$$aor = td * 5$$

Where:  $aor$  = adjustment for optimal rainfalls,  $td$  = temperature difference between optimal and observed values

$$td = ROT - TS$$

Where:  $td$  = temperature difference between optimal and observed values,  $ROT$  = Rounded observed temperatures (to the whole number),  $TS$  = Temperature standard (long term average)
